# Supplementary material for: Synthesis of Ni-Doped Graphene Aerogels for Electrochemical Applications
Source: MDPI journal article supplement (doi:10.3390/gels10030180), 2024-03-04
Supplement: s1 [file s1]

# Synthesis of Ni-Doped Graphene Aerogels for Electrochemical Applications

Marina González-Barriuso <sup>1,2</sup>, Mario Sánchez-Suárez <sup>1</sup>, Judith González-Lavín <sup>1</sup>, Ana Arenillas <sup>1</sup> and Natalia Rey-Raap <sup>1,\*</sup>

<sup>1</sup> Institute of Carbon Science and Technology (INCAR-CSIC), Calle Francisco Pintado Fe, 26, 33011 Oviedo, Spain; marina.gonzalez@unican.es (M.G.-B.); mario.sanchez@incar.csic.es (M.S.-S.); judith.g.lavin@incar.csic.es (J.G.-L.); aapunte@incar.csic.es (A.A.)

<sup>2</sup> Inorganic Chemistry Group, Department of Chemistry and Process and Resource Engineering, School of Industrial and Telecommunication Engineers, University of Cantabria, Avenida de los Castros s.n., 39005 Santander, Spain

\* Correspondence: natalia.rey@incar.csic.es

## Electrochemically Active Surface Area (ECSA)

The electrochemically active surface area (ECSA) is commonly calculated by the following equation:

$$ECSA = Cdl/Cs$$

where  $Cdl$  is the double-layer capacitance and  $Cs$  the specific capacitance of a reference material ( $Cs$ ). It is quite complex to know or determine the exact value of  $Cs$ , especially for inorganic/organic hybrid materials or material with complex structures, so most of the reported publications assumed that  $Cs$  have the same value for all the studied materials or at least range around the same order of magnitude. Thus, the trend of the  $Cdl$  values can be equivalent to that of ECSA.  $Cdl$  was determined by performing cyclic voltammetry (CV) in a three-electrode cell involving the studied samples, an Ag/AgCl electrode, and a glassy carbon electrode as the working, reference, and counter electrodes, respectively. The electrodes were immersed in a 0.1 NaOH solution and the CV were recorded between 0 and 0.3 V (vs Ag/AgCl), in which non-Faradaic processes take place, at different scan rates (from 20 to 140 mV s<sup>-1</sup>). Then,  $Cdl$  was calculated as the slope obtained by plotting the maximum current density (at a potential of 0.15 V) versus the scan rate. Figure S1 shows the CV measured at different scan rates for the undoped sample GA-20 and Ni-doped graphene aerogels.

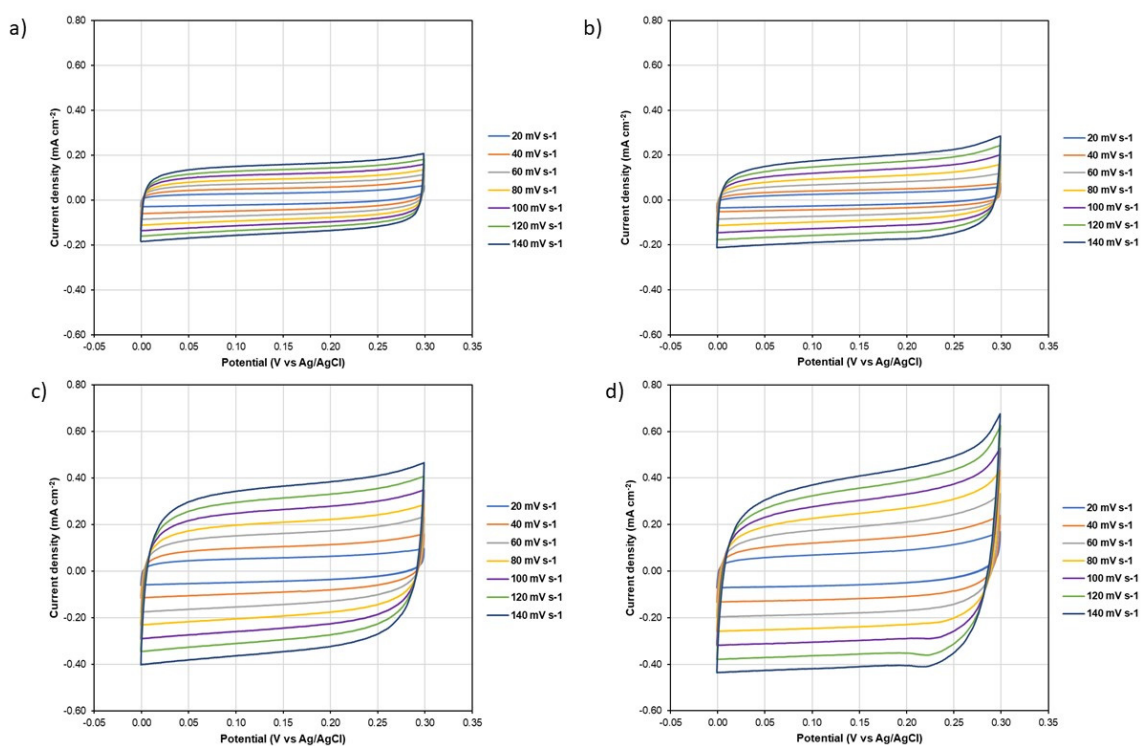

**Figure S1.** Cyclic voltammograms recorded between 0 and 0.3 V (vs Ag/AgCl), in which non-Faradaic processes take place, at different scan rates (from 20 to 140 mV s<sup>-1</sup>) for sample GA-20 (a), GA-20-5%Ni<sub>ac</sub> (b), GA-20-5%Ni<sub>cl</sub> (c), and GA-20-5%Ni<sub>nit</sub> (d).
